1 **Design and fabrication of 3D-printed patient-specific soft tissue and**  
2 **bone phantoms for CT imaging**

3

4 **Kai Mei<sup>1\*</sup>, Pouyan Pasyar<sup>1</sup>, Michael Geagan<sup>1</sup>, Leening P. Liu<sup>1,2</sup>, Nadav Shapira<sup>1</sup>, Grace J.**  
5 **Gang<sup>1,3</sup>, J. Webster Stayman<sup>3</sup>, and Peter B. Noël<sup>1,4</sup>**

6

7

8 <sup>1</sup>Department of Radiology, Perelman School of Medicine, University of Pennsylvania,  
9 Philadelphia, PA, USA.

10 <sup>2</sup>Department of Bioengineering, University of Pennsylvania, Philadelphia, PA, USA.

11 <sup>3</sup>Department of Biomedical Engineering, Johns Hopkins University, Baltimore, MD, USA.

12 <sup>4</sup>Department of Diagnostic and Interventional Radiology, School of Medicine & Klinikum rechts  
13 der Isar, Technical University of Munich, 81675 München, Germany.

14

15

16

17

18

19

20

21

22

23

24

25 Corresponding Authors: Kai Mei \*, Email: [kai.mei@pennmedicine.upenn.edu](mailto:kai.mei@pennmedicine.upenn.edu)

26 Peter B. Noël, Email: [pbnoel@upenn.edu](mailto:pbnoel@upenn.edu)

27

## 28 **Abstract**

29 The objective of this study is to create patient-specific phantoms for computed tomography (CT)  
30 that have realistic image texture and densities, which are critical in evaluating CT performance in  
31 clinical settings. The study builds upon a previously presented 3D printing method (PixelPrint) by  
32 incorporating soft tissue and bone structures. We converted patient DICOM images directly into  
33 3D printer instructions using PixelPrint and utilized stone-based filament to increase Hounsfield  
34 unit (HU) range. Density was modeled by controlling printing speed according to volumetric  
35 filament ratio to emulate attenuation profiles. We designed micro-CT phantoms to demonstrate  
36 the reproducibility and to determine mapping between filament ratios and HU values on clinical  
37 CT systems. Patient phantoms based on clinical cervical spine and knee examinations were  
38 manufactured and scanned with a clinical spectral CT scanner. The CT images of the patient-  
39 based phantom closely resembled original CT images in texture and contrast. Measured  
40 differences between patient and phantom were less than 15 HU for soft tissue and bone marrow.  
41 The stone-based filament accurately represented bony tissue structures across different X-ray  
42 energies, as measured by spectral CT. In conclusion, this study demonstrated the possibility of  
43 extending 3D-printed patient-based phantoms to soft tissue and bone structures while maintaining  
44 accurate organ geometry, image texture, and attenuation profiles.

45

46 **Keywords:** 3D printing, computed tomography, phantoms, bone imaging, quality assurance.

47

## 48 Introduction

49 In computed tomography (CT) research and clinical practice, anthropomorphic and geometric  
50 phantoms play a crucial role. Highly accurate, customizable, and realistic phantoms are  
51 particularly valuable for a variety of purposes, including maintenance, optimization, and  
52 development of software and hardware components of scanners. In recent years, there have been  
53 significant advancements in three-dimensional (3D) printing technology, resulting in numerous  
54 studies on 3D-printed patient-based phantoms for medical imaging [1]–[5]. Compared to  
55 conventional phantoms, 3D-printed phantoms are highly accessible, customizable, and cost-  
56 effective. For example, inexpensive and widely available fused deposition modeling (FDM)  
57 printers can create high-quality anthropomorphic phantoms that accurately depict human  
58 anatomy at reasonable costs.

59  
60 Conventional 3D printing techniques prioritize the replication of object and organ shapes.  
61 Typically, these approaches include segmenting organs of interest from CT scans according to  
62 their specific densities (HU), converting the results into surface meshes (STL files), 3D-printing  
63 each object separately, and then assembling them into a complete phantom [3], [4], [6], [7].  
64 However, each 3D-printed component has a uniform Hounsfield unit (HU), resulting in phantoms  
65 with lacking realistic image textures because their HUs cannot be modulated pixel-by-pixel [8]–  
66 [11]. Furthermore, the lack of natural transitions between different regions, e.g., organs, leads to  
67 loss of detail. A promising alternative is to directly translate digital imaging and communications  
68 in medicine (DICOM) image data into G-code. G-code is a Computer Numerical Control (CNC)  
69 programming language. G-code instructions tell the printer to move in specific directions and at  
70 specific speeds to produce a specific shape or object. One means of controlling the density (as  
71 required for CT phantoms) is to vary the filament extrusion rate (per unit time) on a pixel-by-pixel  
72 basis while maintaining a constant printing speed. A similar approach was used by Okkalidis et  
73 al. [12]–[17]. in conjunction with edge detection and morphological operations to enhance and

74 separate organs. Such processes still yield segmentation errors and loss of small features.  
75 Altering the line width by varying the extrusion rate alone does not provide sufficient spatial  
76 resolution due to the inherently slow response time of the extrusion process. Our group recently  
77 developed PixelPrint [18], a methodology that combines a software tool as well as a standard  
78 FDM printer to create phantoms [19]–[23]. In PixelPrint, DICOM images of the original patient are  
79 directly converted into G-code on a pixel-by-pixel basis. In order to emulate attenuation at each  
80 voxel, density is modeled as a ratio of filament to voxel volume, generating partial volume effects.  
81 The filament ratio is continuously modified by varying the printing speed. Polylactic acid (PLA), a  
82 common printing filament, allows a print range approximately from -850 to 200 HU at different  
83 filament ratios, and has been used to print various patient-based lung phantoms [19].

84  
85 In parallel, significant progress has been made in developing filament materials suitable for FDM  
86 printing in medical applications. Several studies have explored and compared different types of  
87 filament materials for printing human soft tissue and bones [24]–[27]. Conventional materials,  
88 such as PLA and acrylonitrile butadiene styrene (ABS), are widely available and easy to print with.  
89 They have densities ranging from 0.8 to 1.2 g/ml and can represent various human soft tissues  
90 for CT or X-ray examinations. Special materials, such as thermoplastic polyurethanes (TPU), can  
91 provide distinct physical properties to the print, i.e. durability, strength, and elasticity. Specifically  
92 for bone, materials tailored for clinical applications have been introduced for 3D-printed implants.  
93 They are biodegradable by the patient's osteoclasts. As a result, printed objects with such  
94 materials can be fused with the patient's bone, through remodeling during the osteo-cycle [28]–  
95 [30]. Additionally, denser PLA filament mixed with gravimetric powdered stone (PLA/Stone) has  
96 become commercially available. In previous studies, this type of filament has been utilized for  
97 printing phantoms for both diagnostic imaging and radiation therapy [8], [14], [31]–[35]. For  
98 printing even higher density objects, commercially available filament materials mixed with micro  
99 metal powders, i.e. iron or copper, have also been utilized in phantom studies [6].

100



101 This study optimized several aspects of the previously published PixelPrint technique, including  
102 filament line spacing and print speed. Furthermore, StoneFil filament, a type of PLA/Stone  
103 filament, was utilized to expand the density range of our phantoms in order to print bony structures.  
104 Our results illustrate that the PixelPrint technique can create realistic phantoms of the human  
105 spine and knee joint with surrounding soft tissue. The resulting phantoms achieved accurate  
106 geometry, image texture, and attenuation. Moreover, the presented phantoms exhibited similar  
107 spectral attenuation profiles to that of bone structures, which enables their use in various spectral  
108 CT applications.

109

## 110 **Materials and Methods**

### 111 **2.1 PixelPrint and 3D printing**

112 The previously published PixelPrint algorithm was used to create G-code from CT image data to  
113 produce 3D-printed phantoms [18]. Briefly, density information was extracted from the clinical  
114 patient images to generate filament lines that varied in width according to the HU of individual  
115 pixels. These lines were uniformly spaced within each layer and perpendicular on adjacent layers.  
116 By adjusting the filament line widths pixel-by-pixel, volumetric filament per unit space, or infill ratio,  
117 was varied despite only using one type of filament. These different infill ratios then produced  
118 different attenuation in CT images due to the partial volume effect.

119

120 In this study, the filament lines were equally spaced at 0.5 mm. The width of the filament line  
121 changed at resolution of 0.167 mm. The minimum and maximum line widths were 0.2 and 0.5  
122 mm, corresponding to the infill ratio ranging between 40% and 100%, respectively. Keeping a  
123 constant extrusion rate, the print head traveled at varying speeds based on the width of the  
124 extruded filament line. The slowest speed was 180 mm/min for the widest width of 0.5 mm, while  
125 the fastest was 450 mm/min for the smallest width of 0.2 mm. Each layer had a uniform height of  
126 0.2 mm. The resulting volumetric rate of filament extrusion during the whole print remained

127 constant at 18 mm<sup>3</sup>/min. To prevent overlapping of lines in consecutive layers with the same  
128 filament line direction, an offset of 0.167 mm (1/3 of the 0.5 mm line spacing) was introduced.

129

130 All phantoms were printed with Lulzbot TAZ 6 or Sidekick 747 (Fargo Additive Manufacturing  
131 Equipment 3D, LLC Fargo, ND, USA), paired with M175 v2 tool heads and 0.40 mm steel nozzles.  
132 StoneFil filament (FormFutura, AM Nijmegen, the Netherlands) with a diameter 1.75 mm was  
133 utilized. The temperature of the nozzle was set at 200 °C and the bed was warmed to 50 °C to  
134 enhance adherence. Acceleration of the print head was to 500 mm/s<sup>2</sup> and the threshold (jerk  
135 setting) was 8 mm/s.

136

## 137 **2.2 Phantom design**

138 Micro-CT phantom. Three cylindrical phantoms were designed and produced using PixelPrint  
139 filament lines to examine their stability and reproducibility. These filament lines constructed a  
140 matrix smaller than the typical resolution limit of clinical CT scanners. Three phantoms were  
141 printed with identical G-code instructions. These phantoms are 60 mm in length and 20 mm in  
142 diameter. Each of them consists of four sections with different but homogeneous infill ratios (100%,  
143 70%, 50% and 30%). StoneFil filament lines were printed at a spacing of 1 mm in all four sections  
144 but with corresponding line widths of 1.0, 0.7, 0.5, and 0.3 mm, respectively. A thin outer layer  
145 was added to the phantom for support, particularly for low infill ratio sections.

146

147 Calibration phantom. To compute the conversion between StoneFil filament infill ratios and HUs,  
148 a calibration phantom was designed. The phantom is a cylinder with a diameter of 10 cm and  
149 height of 1 cm. It consists of seven equally divided pie slice-shaped sections. Each section was  
150 printed at a fixed line spacing of 0.5 mm but with different filament line widths (0.2 - 0.5 mm),  
151 corresponding to seven infill ratios (40 -100%, with 10% intervals).

152

153 Cervical vertebrae phantom. Institutional Review Board (IRB) approved this retrospective study.  
 154 A cervical vertebrae phantom was created based on a patient image volume (10 x 10 x 10 cm<sup>3</sup>)  
 155 that was acquired on a clinical CT scanner (Siemens SOMATOM Definition Edge, Siemens  
 156 Healthcare GmbH, Erlangen, Germany) at a tube voltage of 120 kVp with a standard diagnostic  
 157 protocol. Table 1 lists detailed acquisition and reconstruction parameters for the patient scan. The  
 158 patient data consist of four cervical vertebrae (C4 to C7), including the trachea and esophagus.  
 159 A circular region of interest with a diameter of 10 cm was cropped in axial slices to form the  
 160 phantom. HUs were converted to infill ratios based on the calibration phantom.

161  
 162 Knee phantom. A knee phantom was similarly generated using a patient scan on a clinical dual-  
 163 layer CT scanner (IQon spectral CT, Philips Healthcare, the Netherlands) at a tube voltage of 120  
 164 kVp, as detailed in Table 1. A circular region of interest with a diameter of 10 cm was cropped  
 165 from the axial slices of the patient's left knee. HUs were then converted to infill ratios.

166

**Table 1. Acquisition parameters of CT image for phantom generation**

|                       | <i>Cervical vertebrae</i>       | <i>Knee</i>                  |
|-----------------------|---------------------------------|------------------------------|
| Scanner model         | Siemens SOMATOM Definition Edge | Philips iQon Spectral CT     |
| Tube voltage          | 120 kVp                         | 120 kVp                      |
| Tube current          | 105 mA                          | 196 mA                       |
| Rotation time         | 1000 ms                         | 1026 ms                      |
| Spiral pitch factor   | 0.8                             | Axial                        |
| Exposure              | 131 mAs                         | 201 mAs                      |
| CTDI <sub>vol</sub>   | 8.85 mGy                        | 17.1 mGy                     |
| Collimation width     | 0.6 / 38.4 mm                   | 0.625 / 40.0 mm              |
| Slice thickness       | 0.6 mm                          | 0.67 mm                      |
| Reconstruction filter | I26s\3                          | B                            |
| Field of view         | 99.75 x 99.75 mm <sup>2</sup>   | 304 x 304 mm <sup>2</sup>    |
| Matrix size           | 228 x 228 pixel <sup>2</sup>    | 512 x 512 pixel <sup>2</sup> |
| Pixel spacing         | 0.4375 mm                       | 0.5938 mm                    |

Collimation width values are noted as single / total collimation width.

167

168

## 169 2.3 Data acquisition

170 Three micro-CT phantoms were separately scanned on a commercial micro-CT (U-CT system,  
171 MILabs, CD Houten, the Netherlands) with a tube voltage of 50 kVp. In addition, these phantoms  
172 were also scanned on a clinical dual-layer CT system (IQon spectral CT, Philips Healthcare, the  
173 Netherlands) at a tube voltage of 120 kVp with a high-resolution protocol and a small field-of-view  
174 of 100 mm. Additional acquisition and reconstruction parameters of the two scans are listed in  
175 Table 2. Micro-CT images were exported from the scanner and reprocessed with a multi-planar  
176 reconstruction algorithm (MPR) in Horos (Horos Project, Annapolis, MD, USA) to ensure filament  
177 lines were parallel to the axial plane.

**Table 2. Scan protocols for the micro-CT phantom**

|                       | Micro-CT                      | Clinical CT                  |
|-----------------------|-------------------------------|------------------------------|
| Scanner model         | MILabs U-CT                   | Philips IQon Spectral CT     |
| Tube voltage          | 50 kVp                        | 120 kVp                      |
| Tube current          | 0.21 mA                       | 130 mA                       |
| Rotation time         | 54 s                          | 1.923 s                      |
| Spiral pitch factor   | Axial scan                    | 0.39                         |
| Exposure              | 11.3 mAs                      | 250 mAs                      |
| CTDI <sub>vol</sub>   | 69 mGy                        | 16.4 mGy                     |
| Collimation width     | -                             | 0.625 / 40.0 mm              |
| Slice thickness       | 0.08 mm                       | 0.67 mm                      |
| Reconstruction filter | -                             | YC                           |
| Field of view         | 22.16 x 22.16 mm <sup>2</sup> | 100 x 100 mm <sup>2</sup>    |
| Matrix size           | 277 x 277 pixel <sup>2</sup>  | 512 x 512 pixel <sup>2</sup> |
| Pixel spacing         | 0.080 mm                      | 0.195 mm                     |

Collimation width values are noted as single / total collimation width.

178

179

180 The calibration, cervical vertebrae, and the knee phantom were scanned inside the QRM chest  
181 phantom (Quality Assurance in Radiology and Medicine GmbH, Möhrendorf, Germany) with the  
182 clinical dual-layer CT system. Protocol parameters matched those of the original clinical  
183 examination of the patient, with the same pixel spacing and slice thickness in Table 1. For the

184 cervical phantom, a 400 mg/ml QRM hydroxyapatite (HA) insert was additionally scanned with  
185 the phantom as a reference for bone mineral density. For both patient-based phantoms, additional  
186 high dose scans were performed at 1000 mAs while keeping the other scanning parameters the  
187 same. This high exposure scan was included to reduce noise for image quality comparisons.

188

## 189 **2.4 Calibration and data analysis**

190 For computing the conversion between HUs and infill ratios, mean and standard deviation HU  
191 values of seven areas were measured in the calibration phantom. Square regions of interest (ROI)  
192 of  $19 \times 19$  pixel<sup>2</sup> ( $13 \times 13$  mm<sup>2</sup>) were manually placed in each of the seven density regions within  
193 10-mm-thick center of the phantom. A linear regression was computed, and the resulting  
194 Pearson's correlation coefficient ( $r$ ) was reported. All measurements were performed on a  
195 workstation with ImageJ (U. S. National Institutes of Health, <https://imagej.nih.gov>), and all  
196 analyses were computed with Python (Python Software Foundation, <https://www.python.org/>).

197

198 For the cervical vertebrae phantom and the knee phantom, CT images were exported from the  
199 scanner and registered to the original patient data (2D-wise) using the OpenCV Library (Open  
200 Source Computer Vision Library [36], <https://opencv.org>). Mean and standard deviation in regions  
201 of interest for different tissue types were measured. Line profiles of the phantom scan were also  
202 compared with the original patient scan. Additionally, virtual monoenergetic images from 40 to  
203 200 keV were extracted to quantify the spectral response of the bone regions within the patient-  
204 based phantoms.

205

## 206 **Results**

207 The high reproducibility of PixelPrint was demonstrated by comparing three identically  
208 manufactured phantoms (Figure 1). In micro-CT scans of the phantoms, the grid-like structures  
209 generated by PixelPrint were clearly visible. Filament lines printed within each region had equal  
210 spacings of 1 mm and a constant width in all three phantoms in the micro-CT scans. The layered

211 structure with introduced offsets (1/3 of 1 mm line spacing) was distinctly visible in orthogonal  
212 views (Figure 1f, 1g, 1h). However, in clinical CT scans with high resolution protocols, these  
213 structures were imperceptible because their size was smaller than the detector resolution. Instead,  
214 they appeared as constant regions due to partial volume effect (Figure 1e). Furthermore, both the  
215 micro-CT and clinical CT scans showed a high linear relationship between infill ratios and mean  
216 HUs in four regions (Pearson's correlation coefficient  $r = 0.984$  and  $0.982$ , respectively).  
217

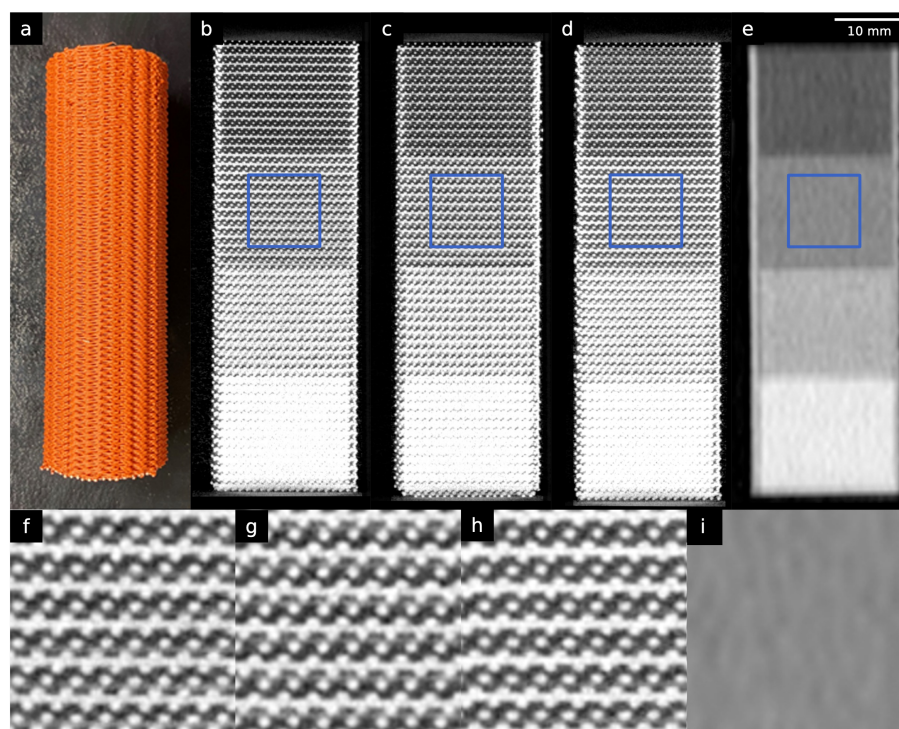

**Figure 1. Micro-CT phantoms.** (a) A photo of one of the three printed micro-CT phantoms. (b)-(d) Orthogonal views of the three different micro-CT phantoms scanned on a micro-CT. (e) Clinical CT image of one of the micro-CT phantoms. (f) – (i) Zoomed views of the regions enclosed by blue squares in (b) - (e). Window level/width are -750/3500 HU for micro-CT images and 0/2000 HU for clinical CT images.

218

---

219 In the calibration phantom, the infill ratio and HU also demonstrated excellent linearity across the  
220 seven regions (Figure 2). The highest infill ratio (100%) region measured  $851 \pm 24.7$  HU, while  
221 the lowest infill ratio (40%) measured  $-227 \pm 25.4$  HU. Pearson's correlation coefficient of greater  
222 than 0.99 indicated a very high positive linear correlation between infill ratios and HUs. A  
223 conversion equation was computed for converting HU to infill ratio:

224

$$5.5258 \times 10^{-4} \times \text{HU} + 0.52797 = \text{Infill Ratio (\%)}$$

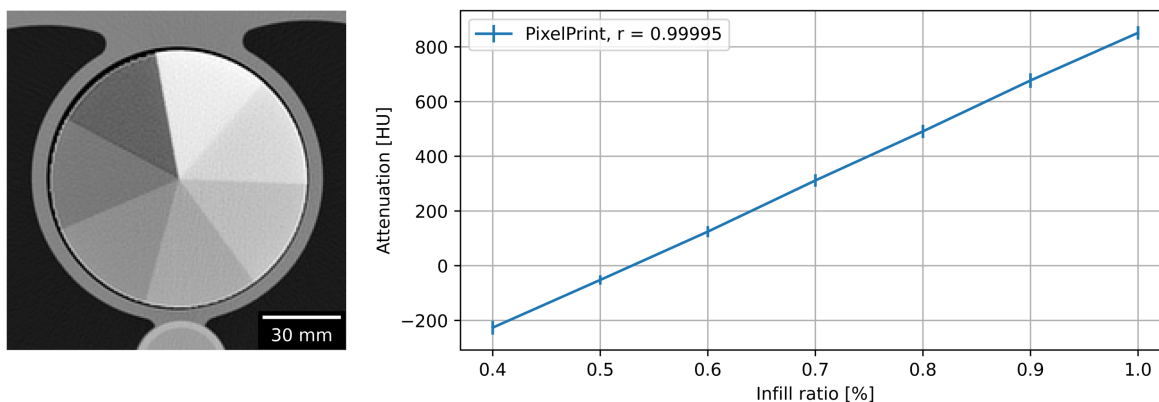

**Figure 2. Linear correlation of filament infill ratio and HUs.** (a) CT image of calibration phantom. Window level and width are 0 HU and 2000 HU. (b) Linear relationship between attenuation and infill ratio. Mean and standard deviation were measured in regions of interest in each area with a distinct infill ratio. Standard deviations are indicated with error bars.

225

226

227 Figure 3 shows the CT images of the cervical vertebrae phantom, while Figure 4 illustrates the  
228 images of the knee phantom. The PixelPrint phantoms closely resembled the original CT images  
229 in terms of contrast and features, with both the shape and the details inside the bones very well  
230 reproduced. The image features in the high dose knee phantom scan appeared as sharp as the  
231 original patient image.



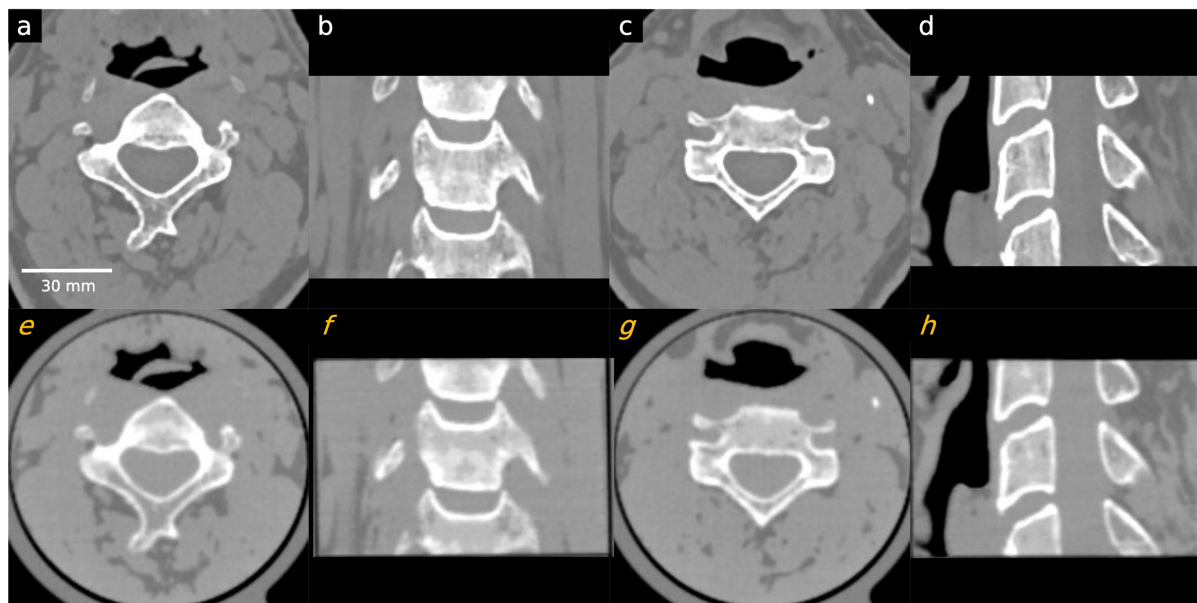

**Figure 3. Comparison between patient CT images and the PixelPrint cervical phantom images.** Images in the first row (a-d) are original DICOM images used to create the PixelPrint cervical phantom. Images on the second row (e-h) are the CT images of the phantom. All images have window level of 0 HU and width of 1200 HU. Sagittal and coronal images are not registered but are approximately at the same location.

232

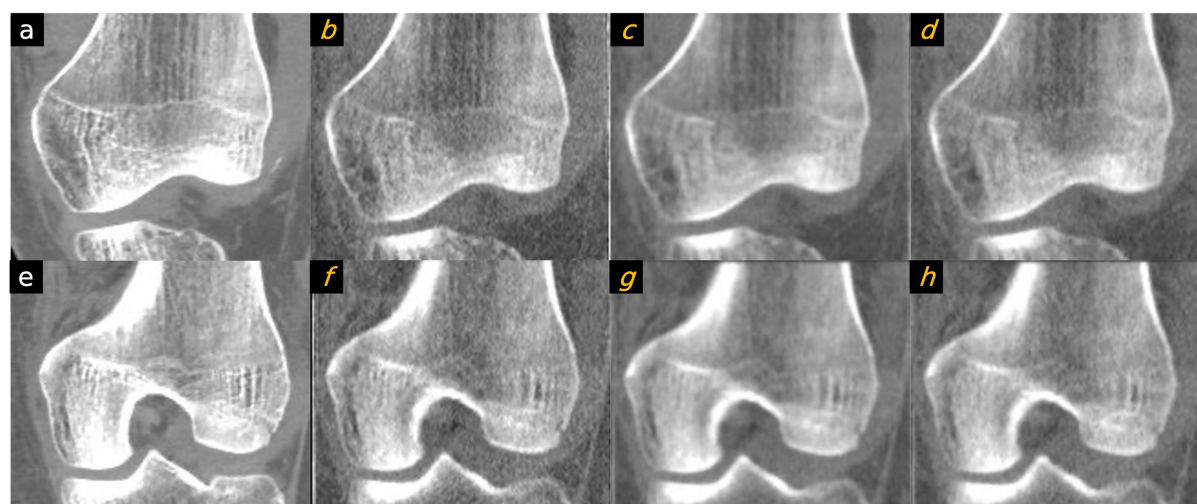

**Figure 4. Comparison between patient image and the PixelPrint knee phantom.** Images in the first column are original DICOM images used to create the PixelPrint knee phantom. Images on the second to fourth column are the CT images of the phantom: (b/f) high dose sharp kernel. (c/f) high dose standard kernel. (d/h) standard dose sharp kernel. All images have window level of 0 HU and width of 1200 HU. Images are not registered but are approximately at the same location.

233

234

235 Patient phantoms showed high accuracy. Line profiles indicated a match in HUs between the CT  
236 image of the cervical vertebrae phantom and the patient data (Figure 5). Quantitative



237 measurements in selected regions of trabecular and cortical bones, as well as adipose- and  
 238 muscle-like soft tissues, are provided in Table 3. Measurements indicated that, except for the  
 239 cortical bone, all other regions had differences of less than 15 HU compared to the patient image.  
 240 Due to the density limitations of the utilized filament, HUs for the cortical bone (region 3 in Figure  
 241 6) were lower than expected.

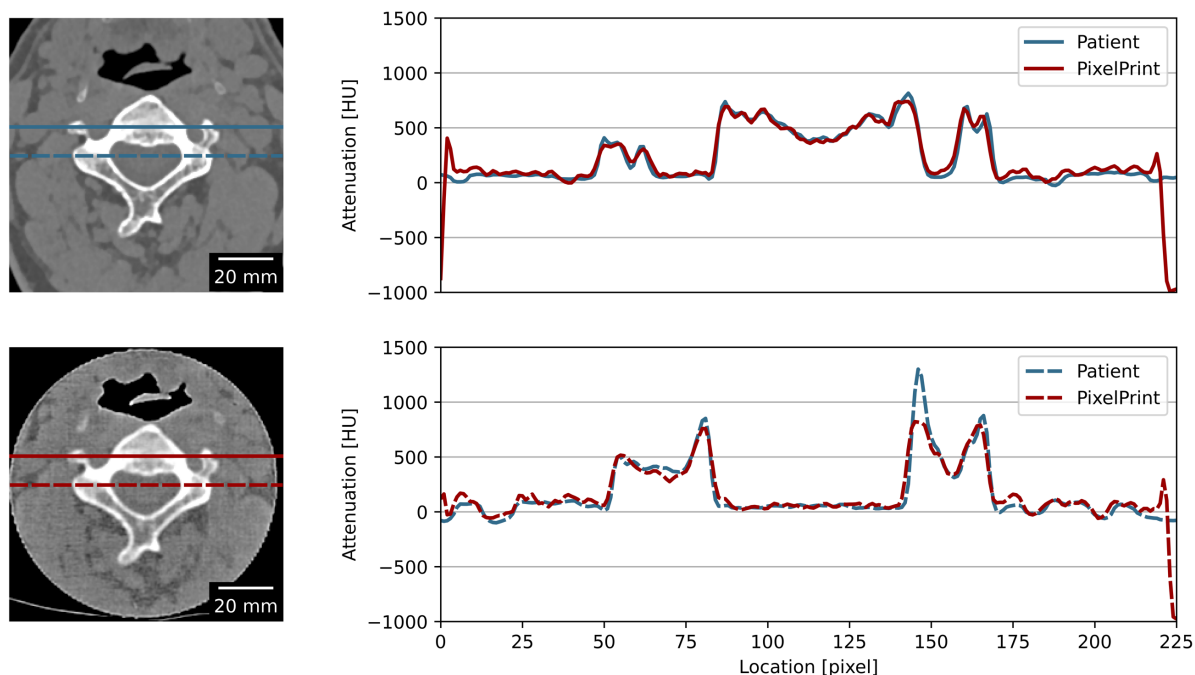

**Figure 5. Line profiles of the PixelPrint phantom and the patient CT images.** Images on the left show the CT images of the phantom (upper) and the patient images (lower). Red and blue lines indicate the location used to measure the line profile plot on the right. Window level and width are 0 HU and 2000 HU. Images were assumed to be at the same location and registered 2D-wise.

242

**Table 3. Measured Hounsfield units for different tissue types in patient and phantom.**

| Area             | Patient           |        |        | PixelPrint Phantom |        |       | difference |
|------------------|-------------------|--------|--------|--------------------|--------|-------|------------|
|                  | mean $\pm$ stdev  | min    | max    | mean $\pm$ stdev   | min    | max   |            |
| 1 Bone I         | 49.3 $\pm$ 31.2   | 3.4    | 175.8  | 57.1 $\pm$ 45.5    | -45.0  | 185.3 | +7.8       |
| 2 Bone II        | 363.9 $\pm$ 50.9  | 242.2  | 452.1  | 349.2 $\pm$ 47.0   | 232.8  | 504.6 | -14.7      |
| 3 Cortical Bone  | 1319.7 $\pm$ 87.4 | 1008.9 | 1406.8 | 800.6 $\pm$ 14.5   | 760.6  | 837.9 | -519.0     |
| 4 Soft tissue I  | 55.6 $\pm$ 8.5    | 36.5   | 76.3   | 53.1 $\pm$ 24.1    | 5.4    | 107.3 | -2.5       |
| 5 Soft tissue II | -78.1 $\pm$ 13.5  | -105.9 | -55.8  | -66.2 $\pm$ 44.7   | -174.9 | 9.6   | +11.9      |

All measurements are in HUs. Stdev stands for standard deviation. Patient and phantom images were assumed to be the same z location and registered 2D-wise.

243

244  
245 Comparable spectral characteristics of the phantom to those of human bone were observed.  
246 Figure 6 depicts the spectral attenuation profile of various regions of interest (marked in the left  
247 panel) and a 400 mg/ml hydroxyapatite insert (displayed in dark blue in right panel). It is  
248 noteworthy that the phantom was fabricated using only one type of filament, and thus, the  
249 background, which represents soft tissue, has artificial amounts of calcium.

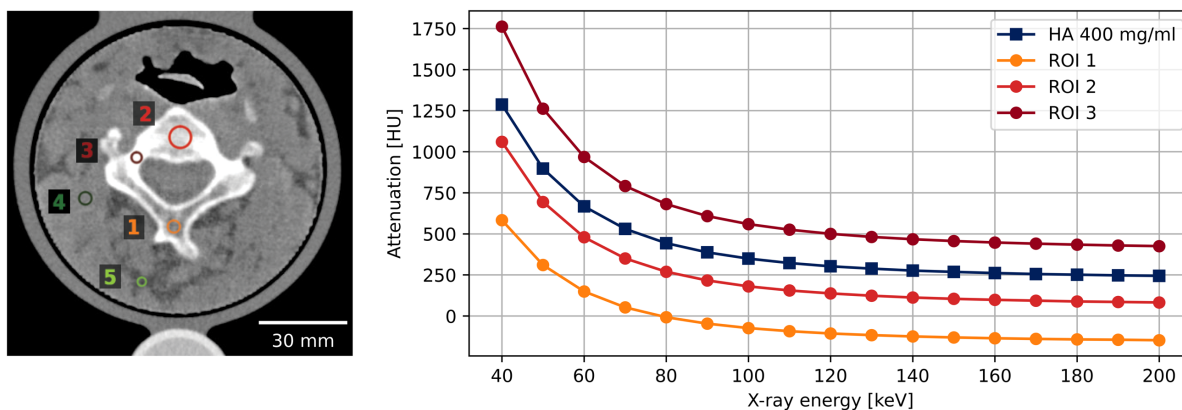

**Figure 6. Virtual monoenergetic HU measured with spectral CT.** Regions of interest (ROI) are marked in left. Window level and width are 100 and 800 HU. Reference values from a 400 mg/ml hydroxyapatite (HA) insert are marked by dark blue squares.

250

---

251

## 252 Discussion

253 This paper demonstrated how PixelPrint can be utilized to create patient-specific 3D printed bone  
254 and soft tissue CT phantoms using one filament. Our approach provides economical and efficient  
255 means of producing high resolution CT phantoms, exhibiting excellent accuracy in HU and image  
256 texture characteristics in CT scans. These phantoms are useful for a wide range of academic  
257 research and clinical evaluation of CT performance.

258

259 In contrast to prior studies of image-based 3D printed bone phantoms using slices of the human  
260 head/skull [13], chest/thoracic cage [15], pelvis [14] and femoral shaft [6], this study printed the  
261 human cervical vertebrae with surrounding soft tissue. Human vertebrae particularly present a

262 challenging task for 3D printing, as they contain intricate details and are comparatively smaller in  
263 size. Nevertheless, these areas, especially in combination with the adjacent tissues, are not only  
264 fundamental in clinical diagnostic applications, such as the assessment of severe fractures or  
265 degenerative diseases, but also crucial in surgical interventional planning. Our phantoms possess  
266 the potential to be utilized for those applications, such as optimizing CT protocols for the  
267 assessment of bone mineral density [37] among others. Here, only human cervical vertebrae and  
268 knee joint phantoms were printed, but the approach can be extended to any bone structure. With  
269 StoneFil filament, a range of approximately -227 HU to 851 HU for a CT scans with a tube voltage  
270 of 120 kVp can be reliably printed using PixelPrint, with a deviation of less than 15 HU compared  
271 to patient data. This range covers most tissue types in the human body and is applicable to various  
272 research applications.

273

274 Continuing our previously published research on the PixelPrint lung phantom [18], [19], this study  
275 not only extended the types of human tissue printed, but also enhanced the resolution and stability  
276 of PixelPrint. Filament line spacing was reduced from 1.0 to 0.5 mm, potentially doubling the  
277 resolution capabilities of the printed phantoms. Phantoms produced using this approach can have  
278 greater filament coverage and finer details in a given area, serving as valuable tools to evaluate  
279 the efficacy of novel higher resolution CT systems such as photon-counting CT [38]–[40]. Printing  
280 finer lines with PLA/Stone filament poses more challenges to printer stability control and requires  
281 finer system tuning. By optimizing extrusion rate, printing speed, nozzle temperature, and  
282 acceleration speed, PixelPrint can still produce highly accurate patient phantoms in reliable  
283 stability as demonstrated by qualitative and quantitative evaluation. Additionally, micro-CT  
284 acquisitions revealed that filament lines and underlying structure can be generated with high  
285 degree of consistency.

286

287 With the growing popularity and accessibility of 3D printing technology, a variety of printing  
288 filaments are now available for printing human bone and soft tissue. Several studies have

289 discussed materials for 3D-printed phantoms in CT [24]–[26]. Novel filament materials composed  
290 of hydroxyapatite and biocompatible, biodegradable polymers, such as CT-Bone (Xilloc Medical  
291 Int., Sittard-Geleen, the Netherlands), can be utilized for printing synthetic bone implants that  
292 rapidly induce bone regeneration and growth [41], [42]. Filaments made from composites of fatty  
293 acids and ceramic powders have also been explored [28]. However, bone-like filaments available  
294 in the general market (FibreTuff, Toledo, OH, USA), suitable for medical surgery purposes [29],  
295 [30], do not necessarily have high radiometric densities and are not capable to reach much higher  
296 than 400 HU in CT scans. While cancellous bone is only about 300 to 400 HU in CT images,  
297 cortical bone can range from 500 HU and up to over 1900 HU [43]. By contrast, materials such  
298 as vinyl and PLA with stone (PLA/stone) can offer up to nearly 1000 HU at 96.9% infill ratio at  
299 tube voltage of 120 kVp, as they exhibit relatively higher X-ray absorption. Additionally,  
300 considering materials for spectral CT phantoms, high impact polystyrene (HIPS) based filaments  
301 may be suitable for mimicking CT numbers in applications where energy dependence is important  
302 [26], because they show similar spectral profiles as the human body. In this study, we employed  
303 StoneFil filament, one type of PLA/stone filament. Unlike normal PLA, StoneFil filament is  
304 gravimetrically filled with 50% powdered stones, resulting in significantly higher material density  
305 and enabling denser printed objects. Carbonate calcium-containing limestones exhibit a similar  
306 X-ray response in CT to that of human bone, whose density can be attributed to hydroxyapatite.  
307 This property was reflected in the the spectral response of the printed vertebrae with its similarity  
308 to that of hydroxyapatite.

309

310 This study has a few limitations: (i) The filament used in our study did not encompass the entire  
311 range of Hounsfield Units (HU) required for bone structures. Future research should focus on the  
312 development of next-generation filaments that cover the full HU range while preserving spectral  
313 capabilities. (ii) The calcium-based material used in the printing process was applied to the entire  
314 print, including soft tissue regions. While this approach does not severely impact performance in  
315 conventional CT applications, it may have an influence on the evaluation with spectral CT. To

316 achieve the full dynamic range with spectral characterization for both soft tissue and bone, further  
317 development of multiple print head systems will be required. (iii) The printed phantoms were  
318 limited to a specific field of view. Future studies should explore the potential to print larger  
319 anatomical regions, such as the entire chest or abdomen.

320

## 321 **Conclusion**

322 Our study successfully showed the feasibility of using PixelPrint and stone-based filament to 3D-  
323 print patient-based bone phantoms with surrounding soft tissue for use in clinical CT applications.  
324 The resulting phantoms accurately replicated patient's CT imaging, including precise organ  
325 geometry, image texture, and attenuation profiles for spectral CT, which can greatly benefit both  
326 academic research and clinical applications.

327

## 328 **Acknowledgements**

329 We acknowledge support through the National Institutes of Health (R01CA249538,  
330 R01EB030494, and R01EB031592).

331

## 332 **References**

- 333 [1] R. Tino, A. Yeo, M. Leary, M. Brandt, and T. Kron, "A systematic review on 3D-Printed imaging and  
334 dosimetry phantoms in radiation therapy," *Technol Cancer Res Treat*, vol. 18, pp. 1–14, 2019, doi:  
335 10.1177/1533033819870208.
- 336 [2] V. Filippou and C. Tsoumpas, "Recent advances on the development of phantoms using 3D  
337 printing for imaging with CT, MRI, PET, SPECT, and ultrasound," *Med Phys*, vol. 45, no. 9, pp.  
338 e740–e760, 2018, doi: 10.1002/mp.13058.
- 339 [3] F. Rengier *et al.*, "3D printing based on imaging data: Review of medical applications," *Int J*  
340 *Comput Assist Radiol Surg*, vol. 5, no. 4, pp. 335–341, 2010, doi: 10.1007/s11548-010-0476-x.
- 341 [4] M. Leary *et al.*, "Additive Manufacture of Lung Equivalent Anthropomorphic Phantoms: A  
342 Method to Control Hounsfield Number Utilizing Partial Volume Effect," *J Eng Sci Med Diagn Ther*,  
343 vol. 3, no. 1, 2020, doi: 10.1115/1.4044460.

- 344 [5] N. Okkalidis, "3D printing methods for radiological anthropomorphic phantoms," *Physics in*  
345 *Medicine and Biology*, vol. 67, no. 15. Institute of Physics, Aug. 07, 2022. doi: 10.1088/1361-  
346 6560/ac80e7.
- 347 [6] R. Tino, A. Yeo, M. Brandt, M. Leary, and T. Kron, "The interlace deposition method of bone  
348 equivalent material extrusion 3D printing for imaging in radiotherapy," *Mater Des*, vol. 199, p.  
349 109439, 2021, doi: 10.1016/j.matdes.2020.109439.
- 350 [7] J. Illi *et al.*, "Translating Imaging Into 3D Printed Cardiovascular Phantoms: A Systematic Review  
351 of Applications, Technologies, and Validation," *JACC: Basic to Translational Science*, vol. 7, no. 10.  
352 Elsevier Inc., pp. 1050–1062, Oct. 01, 2022. doi: 10.1016/j.jacbts.2022.01.002.
- 353 [8] B. A. Hamedani, A. Melvin, K. Vaheesan, S. Gadani, K. Pereira, and A. F. Hall, "Three-dimensional  
354 printing CT-derived objects with controllable radiopacity," *J Appl Clin Med Phys*, vol. 19, no. 2, pp.  
355 317–328, 2018, doi: 10.1002/acm2.12278.
- 356 [9] C. Hazelaar *et al.*, "Using 3D printing techniques to create an anthropomorphic thorax phantom  
357 for medical imaging purposes," *Med Phys*, vol. 45, no. 1, pp. 92–100, 2018, doi:  
358 10.1002/mp.12644.
- 359 [10] T. Kairn, S. B. Crowe, and T. Markwell, "Use of 3D Printed Materials as Tissue-Equivalent  
360 Phantoms," *IFMBE Proc*, vol. 51, pp. 728–731, 2015, doi: 10.1007/978-3-319-19387-8.
- 361 [11] M. Leary *et al.*, "Additive manufacture of custom radiation dosimetry phantoms: An automated  
362 method compatible with commercial polymer 3D printers," *Mater Des*, vol. 86, pp. 487–499,  
363 2015, doi: 10.1016/j.matdes.2015.07.052.
- 364 [12] N. Okkalidis, "A novel 3D printing method for accurate anatomy replication in patient-specific  
365 phantoms," *Med Phys*, vol. 45, no. 10, pp. 4600–4606, 2018, doi: 10.1002/mp.13154.
- 366 [13] N. Okkalidis and G. Marinakis, "Technical Note: Accurate replication of soft and bone tissues with  
367 3D printing," *Med Phys*, vol. 47, no. 5, pp. 2206–2211, 2020, doi: 10.1002/mp.14100.
- 368 [14] N. Okkalidis, K. Bliznakova, and N. Kolev, "A filament 3D printing approach for CT-compatible  
369 bone tissues replication," *Physica Medica*, vol. 102, pp. 96–102, Oct. 2022, doi:  
370 10.1016/j.ejmp.2022.09.009.
- 371 [15] K. Bliznakova, N. Okkalidis, N. Dukov, S. Zikopoulos, and Z. Bliznakov, "Application of 3D printed  
372 anthropomorphic phantoms for research and educational purposes in digital radiology," *2020 8th*  
373 *E-Health and Bioengineering Conference, EHB 2020*, pp. 30–33, 2020, doi:  
374 10.1109/EHB50910.2020.9280163.
- 375 [16] K. Bliznakova *et al.*, "Physical anthropomorphic breast phantoms for X-ray imaging techniques:  
376 Manufacturing approach," *2020 8th E-Health and Bioengineering Conference, EHB 2020*, pp. 24–  
377 27, 2020, doi: 10.1109/EHB50910.2020.9280109.
- 378 [17] N. Dukov *et al.*, "Experimental evaluation of physical breast phantoms for 2D and 3D breast x-ray  
379 imaging techniques," in *8th European Medical and Biological Engineering Conference: Proceedings of the EMBEC 2020, November 29–December 3, 2020 Portorož, Slovenia*, 2021, pp.  
380 544–552.  
381

- 382 [18] K. Mei *et al.*, “Three-dimensional printing of patient-specific lung phantoms for CT imaging:  
383 Emulating lung tissue with accurate attenuation profiles and textures,” *Medical Physics*, vol. 49,  
384 no. 2. John Wiley and Sons Ltd, pp. 825–835, Feb. 01, 2022. doi: 10.1002/mp.15407.
- 385 [19] K. Mei *et al.*, “PixelPrint: a collection of three-dimensional CT phantoms of different respiratory  
386 diseases.,” in *SPIE Medical Imaging*, 2023.
- 387 [20] K. Mei *et al.*, “PixelPrint: three-dimensional printing of patient-specific soft tissue and bone  
388 phantoms for CT,” in *7th International Conference on Image Formation in X-Ray Computed  
389 Tomography, 2022*, vol. 12304, pp. 545–550.
- 390 [21] N. Shapira *et al.*, “PixelPrint: three-dimensional printing of realistic patient-specific lung  
391 phantoms for CT imaging,” Mar. 2022, p. 31. doi: 10.1117/12.2611805.
- 392 [22] N. Shapira *et al.*, “PixelPrint: Three-dimensional printing of realistic patient-specific lung  
393 phantoms for validation of computed tomography post-processing and inference algorithms,”  
394 *medRxiv*, pp. 2022–2025, 2022.
- 395 [23] S. G. M. , Y. L. & N. P. B. Hsieh *et al.*, “A dense search challenge phantom fabricated with pixel-  
396 based 3D printing for precise detectability assessment ,” in *SPIE Medical Imaging*, 2023.
- 397 [24] R. Bibb, D. Thompson, and J. Winder, “Computed tomography characterisation of additive  
398 manufacturing materials,” *Med Eng Phys*, vol. 33, no. 5, pp. 590–596, 2011.
- 399 [25] O. L. Danciewicz, S. R. Sylvander, T. S. Markwell, S. B. Crowe, and J. V. Trapp, “Radiological  
400 properties of 3D printed materials in kilovoltage and megavoltage photon beams,” *Physica  
401 Medica*, vol. 38, pp. 111–118, 2017, doi: 10.1016/j.ejmp.2017.05.051.
- 402 [26] X. Ma, M. Figl, E. Unger, M. Buschmann, and P. Homolka, “X-ray attenuation of bone, soft and  
403 adipose tissue in CT from 70 to 140 kV and comparison with 3D printable additive manufacturing  
404 materials,” *Sci Rep*, vol. 12, no. 1, p. 14580, Aug. 2022, doi: 10.1038/s41598-022-18741-4.
- 405 [27] J. Solc, T. Vrba, and L. Burianova, “Tissue-equivalence of 3D-printed plastics for medical  
406 phantoms in radiology,” *Journal of Instrumentation*, vol. 13, no. 9, 2018, doi: 10.1088/1748-  
407 0221/13/09/P09018.
- 408 [28] M. B. Jensen *et al.*, “Composites of fatty acids and ceramic powders are versatile biomaterials for  
409 personalized implants and controlled release of pharmaceuticals,” *Bioprinting*, vol. 10, Jun. 2018,  
410 doi: 10.1016/j.bprint.2018.e00027.
- 411 [29] R. (Ross) Salary, “Perspective Chapter: Advanced Manufacturing for Bone Tissue Engineering and  
412 Regenerative Medicine,” in *Advanced Additive Manufacturing*, I. V Shishkovsky, Ed. Rijeka:  
413 IntechOpen, 2022. doi: 10.5772/intechopen.102563.
- 414 [30] M. Yu, Y. J. Yeow, L. Lawrence, P. P. Claudio, J. B. Day, and R. Salary, “Characterization of the  
415 Functional Properties of Polycaprolactone Bone Scaffolds Fabricated Using Pneumatic Micro-  
416 Extrusion,” *J Micro Nanomanuf*, vol. 9, no. 3, Sep. 2021, doi: 10.1115/1.4051631.
- 417 [31] S. Hatamikia *et al.*, “3D printed patient-specific thorax phantom with realistic heterogenous bone  
418 radiopacity using filament printer technology,” *Z Med Phys*, vol. 32, no. 4, pp. 438–452, Nov.  
419 2022, doi: 10.1016/j.zemedi.2022.02.001.



- 420 [32] S. Hatamikia *et al.*, “Realistic 3D printed CT imaging tumor phantoms for validation of image  
421 processing algorithms,” *Physica Medica*, vol. 105, Jan. 2023, doi: 10.1016/j.ejmp.2022.102512.
- 422 [33] S. K. Goodall, P. Rampant, W. Smith, D. Waterhouse, P. Rowshanfarzad, and M. A. Ebert,  
423 “Investigation of the effects of spinal surgical implants on radiotherapy dosimetry: A study of 3D  
424 printed phantoms,” *Med Phys*, vol. 48, no. 8, pp. 4586–4597, Aug. 2021, doi: 10.1002/mp.15070.
- 425 [34] T. Kairn, M. Zahrani, N. Cassim, A. G. Livingstone, P. H. Charles, and S. B. Crowe, “Quasi-  
426 simultaneous 3D printing of muscle-, lung- and bone-equivalent media: a proof-of-concept  
427 study,” *Phys Eng Sci Med*, vol. 43, no. 2, pp. 701–710, 2020, doi: 10.1007/s13246-020-00864-5.
- 428 [35] V. Giacometti *et al.*, “3D-printed patient-specific pelvis phantom for dosimetry measurements for  
429 prostate stereotactic radiotherapy with dominant intraprostatic lesion boost,” *Physica Medica*,  
430 vol. 92, pp. 8–14, Dec. 2021, doi: 10.1016/j.ejmp.2021.10.018.
- 431 [36] G. Bradski, “The OpenCV Library,” *Dr. Dobb’s Journal of Software Tools*, 2000.
- 432 [37] K. Mei *et al.*, “Is multidetector CT-based bone mineral density and quantitative bone  
433 microstructure assessment at the spine still feasible using ultra-low tube current and sparse  
434 sampling?,” *Eur Radiol*, pp. 1–11, 2017, doi: 10.1007/s00330-017-4904-y.
- 435 [38] M. J. Willeminck, M. Persson, A. Pourmorteza, N. J. Pelc, and D. Fleischmann, “Photon-counting  
436 CT: technical principles and clinical prospects,” *Radiology*, vol. 289, no. 2, pp. 293–312, 2018.
- 437 [39] S. Si-Mohamed *et al.*, “Review of an initial experience with an experimental spectral photon-  
438 counting computed tomography system,” *Nucl Instrum Methods Phys Res A*, vol. 873, pp. 27–35,  
439 2017.
- 440 [40] L. P. Liu *et al.*, “First-generation clinical dual-source photon-counting CT: ultra-low-dose  
441 quantitative spectral imaging,” *Eur Radiol*, pp. 1–9, 2022.
- 442 [41] Y. Kanno *et al.*, “Computed tomographic evaluation of novel custom-made artificial bones, ‘CT-  
443 bone’, applied for maxillofacial reconstruction,” *Regen Ther*, vol. 5, pp. 1–8, Dec. 2016, doi:  
444 10.1016/j.reth.2016.05.002.
- 445 [42] A. Hikita, U. Il Chung, K. Hoshi, and T. Takato, “Bone Regenerative Medicine in Oral and  
446 Maxillofacial Region Using a Three-Dimensional Printer,” *Tissue Eng Part A*, vol. 23, no. 11–12,  
447 pp. 515–521, Jun. 2017, doi: 10.1089/ten.tea.2016.0543.
- 448 [43] S. Patrick, N. P. Birur, K. Gurushanth, A. S. Raghavan, S. Gurudath, and others, “Comparison of  
449 gray values of cone-beam computed tomography with hounsfield units of multislice computed  
450 tomography: an in vitro study,” *Indian Journal of Dental Research*, vol. 28, no. 1, p. 66, 2017.

451

452

## 453 Author Contribution

454 K.M., M.G. and P.N. devised the project, the main conceptual ideas and proof outline. N.S., G.G

455 and J.W. contributed to the design and the research.

456 K.M. implemented the idea. K.M. P.P. and L.L. performed the experiments and measurements.



457 K.M. analysed the data and wrote the manuscript with support from L.L. and P.N. N.S., G.G and  
458 J.W. helped the revision of the manuscript.

### 459 **Additional Information**

460 The authors have no relevant conflicts of interest to disclose.

### 461 **Data Availability**

462 Datasets generated during this study are available from the corresponding author upon  
463 reasonable request.

464
